# Supplementary material for: Characterizing early embryonic development of Brown Tsaiya Ducks (Anas platyrhynchos) in comparison with Taiwan Country Chicken (Gallus gallus domestics)
Source: PubMed Central journal article supplement (PMC5942818; doi:10.1371/journal.pone.0196973), 2018-05-09
Supplement: pone.0196973.s001.pdf [file pone.0196973.s001.pdf]

1 **S1 Table. Summary of key developmental features of Taiwan Country Chicken embryos during the first 72 h of incubation.**

| Stage   | Hours post-incubation | Stage description relative to the HH staging system (Taiwan Country Chicken, NCHU B line × S line)                                                                               |
|---------|-----------------------|----------------------------------------------------------------------------------------------------------------------------------------------------------------------------------|
| 1 (HH1) | 0-5                   | The prestreak stage; two-layered germinal disc was formed.                                                                                                                       |
| 2 (HH2) | 6-7                   | The initial primitive streak, the beginning of streak formation: the primitive streak occurred as a short conical condensation in the area pellucida.                            |
| 3 (HH3) | 12-13                 | Intermediate streak elongation: the primitive streak extended to the center of the area pellucida; no primitive groove appeared yet.                                             |
| 4 (HH4) | 18-19                 | Definitive streak formation: the primitive streak reached its maximal length; Hensen's node, primitive pit, and primitive groove were present; no head process was observed yet. |
| 5 (HH5) | 19-22                 | Visible head process; no head fold was observed yet. Hensen's node and definitive primitive streak are clearly visible                                                           |
| 6 (HH6) | 22-25                 | Appearance of the head fold; no somite was observed yet.                                                                                                                         |
| 7 (HH7) | 24-26                 | The first somite appeared; neural folds and the neural plate were observed.                                                                                                      |
| 8 (HH8) | 26-29                 | The 4-somite stage; neural folds from both sides united around the midbrain.                                                                                                     |
| 9 (HH9) | 29-33                 | The 7-somite stage; visible primary optical vesicles; the progressive of fusion of the paired heart primordia were began into tubes unite.                                       |

2 **S1 Table. (Continued)**

---

|           |       |                                                                                                                                                                                                                                                                                                                        |
|-----------|-------|------------------------------------------------------------------------------------------------------------------------------------------------------------------------------------------------------------------------------------------------------------------------------------------------------------------------|
| 10 (HH10) | 33-39 | The 10-somite stage; cranial flexure gradually appeared; 3 distinguishable primary brain vesicles (a mesencephalon; midbrain, behind the prosencephalon; forebrain and a rhombencephalon; hindbrain); The heart slightly bent to the right.                                                                            |
| 11 (HH11) | 40-45 | The 13-somite stage; cranial flexure was prominent; 5 neuromeres formed; optic vesicles constricted at the base; heart loop completely bent to the right.                                                                                                                                                              |
| 12 (HH12) | 45-49 | The 16-somite stage; head turning to the left; anterior neuropore closed; telencephalon initiated; primary optic vesicles and optic stalk established; visible auditory pit wide open; heart formed a slightly S-shaped; head fold of the amnion covered the forebrain.                                                |
| 13 (HH13) | 48-52 | The 19-somite stage; distinct enlargement of the telencephalon; no hypophysis being observable yet; head folds of amnion are covered up the forebrain until anterior part of the hindbrain.                                                                                                                            |
| 14 (HH14) | 50-53 | The 22-somite stage; cranial and trunk flexures of embryo developed; visceral arches 1 and 2 and visceral clefts 1 and 2 were visible; the primary optic vesicle and lens placode were formed; opening of the auditory pit constricted; the amnion enlarged and extended to somites 7 – 10.                            |
| 15 (HH15) | 50-55 | The 24 to 27-somites stage; the 3 <sup>rd</sup> visceral arch and cleft became visible; the optic cup was completely formed.                                                                                                                                                                                           |
| 16 (HH16) | 52-56 | The 26 to 28-somite stage; the primordia of wings and legs were present; epiphysis was not formed yet.                                                                                                                                                                                                                 |
| 17 (HH17) | 52-64 | The 29 to 32-somite stage; lateral body folds extended around the entire circumference of embryos; cranial flexure unchanged but the cervical and trunk flexures became more prominent than the previous stages; the tail-bud bent ventrally; the amnion may be variably observable; the allantois had not formed yet. |

---

4 **S1 Table. (Continued)**

---

|           |       |                                                                                                                                                                                                                                                                                                                                                                                                                  |
|-----------|-------|------------------------------------------------------------------------------------------------------------------------------------------------------------------------------------------------------------------------------------------------------------------------------------------------------------------------------------------------------------------------------------------------------------------|
| 18 (HH18) | 65-69 | The 30 to 36-somite stage; leg buds were larger than wing buds; trunk flexure shifted to lumbal region; tail bud turned to the right; the amnion closed and the allantois remained a small, thick-walled bud; the 4 <sup>th</sup> visceral arch was undefined and the maxillary process was still absent                                                                                                         |
| 19 (HH19) | 68-72 | The 37 to 40-somite stage; the limb buds were symmetrical; trunk flexure disappeared; the tail-bud curved and pointed forward; visceral arches appeared: the maxillary process appeared, enlarged and became distinctive; the 1st visceral cleft open as a narrow slit, but the 4th visceral cleft did not open; the eyes remained unpigmented; the allantois was of variable sizes and without vascularization. |

---
